# Supplementary material for: Co-Polymers based on Poly(1,4-butylene 2,5-furandicarboxylate) and Poly(propylene oxide) with Tuneable Thermal Properties: Synthesis and Characterization
Source: MDPI journal article supplement (doi:10.3390/ma12020328), 2019-01-21
Supplement: s1 [file s1]

# Copolymers based on poly(1,4-butylene 2,5-furandicarboxylate) and Poly(Propylene Oxide) with Tuneable Thermal Properties: Synthesis and Characterization

## 1. Structural Characterization

### 1.1. NMR Results

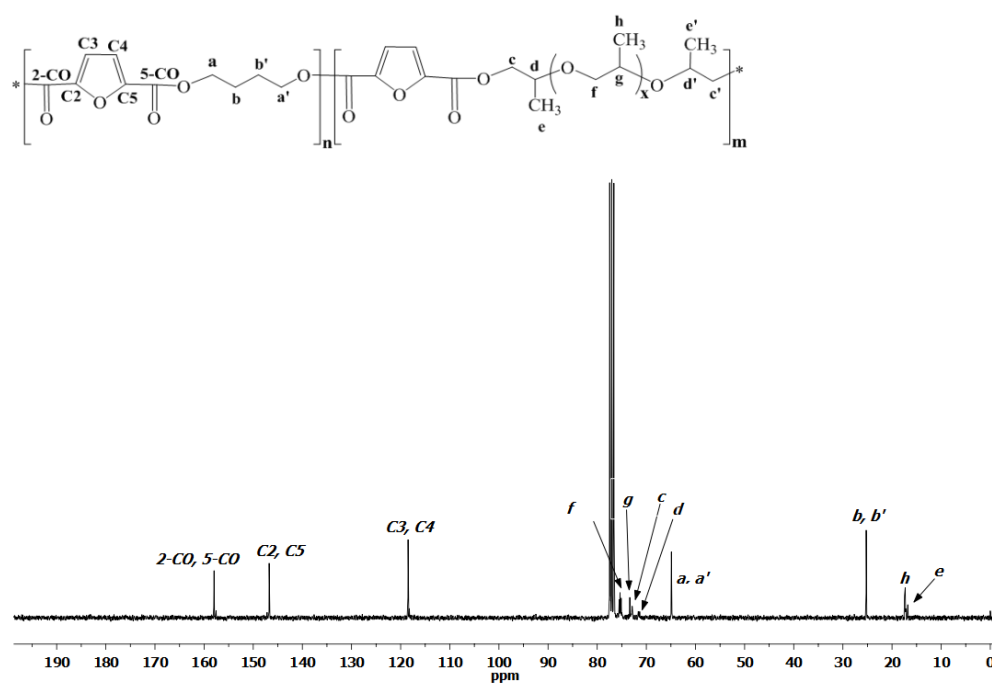

Figure S1.  $^{13}\text{C}$  NMR spectra in  $\text{CHCl}_3\text{-}d$  of PBF-co-PPOF-90/10 copolymer.

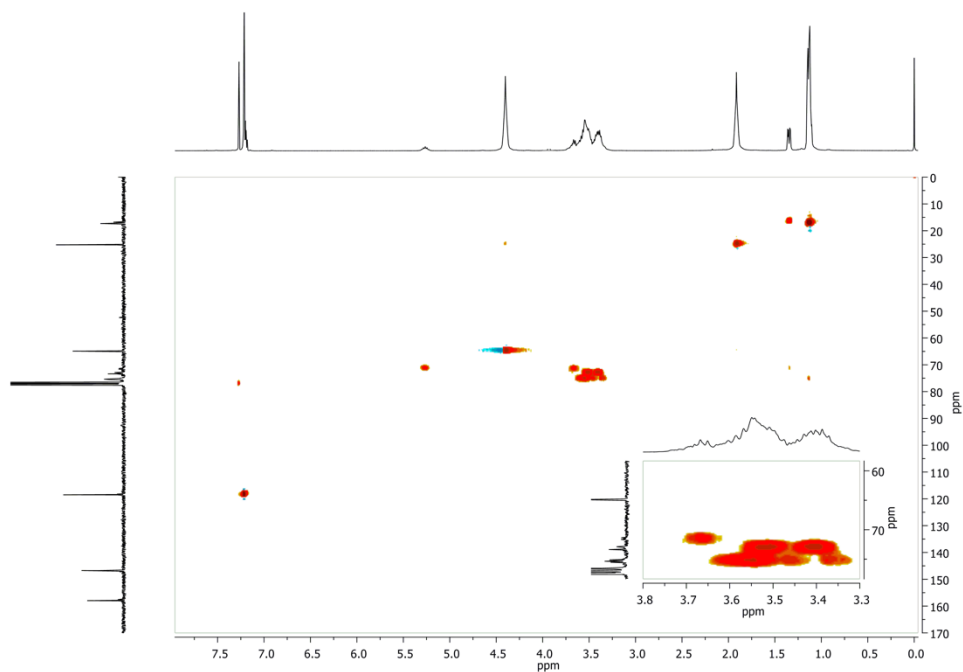

Figure S2. 2D NMR spectrum in  $\text{CHCl}_3-d$  of PBF-co-PPOF-90/10 copolymer.

### 1.2. Thermal Behaviour

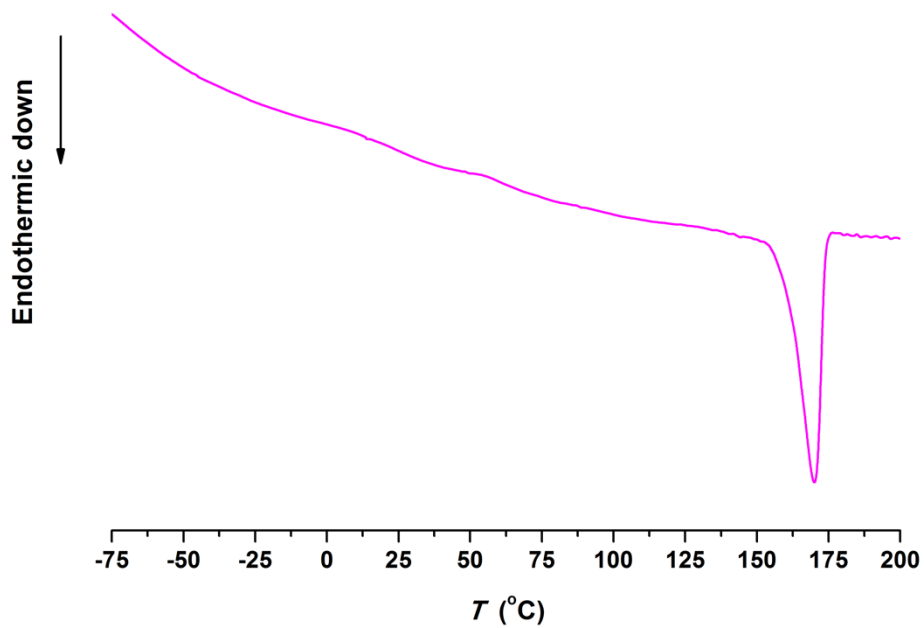

Figure S3. DSC curve of PBF homopolymer.

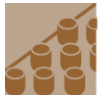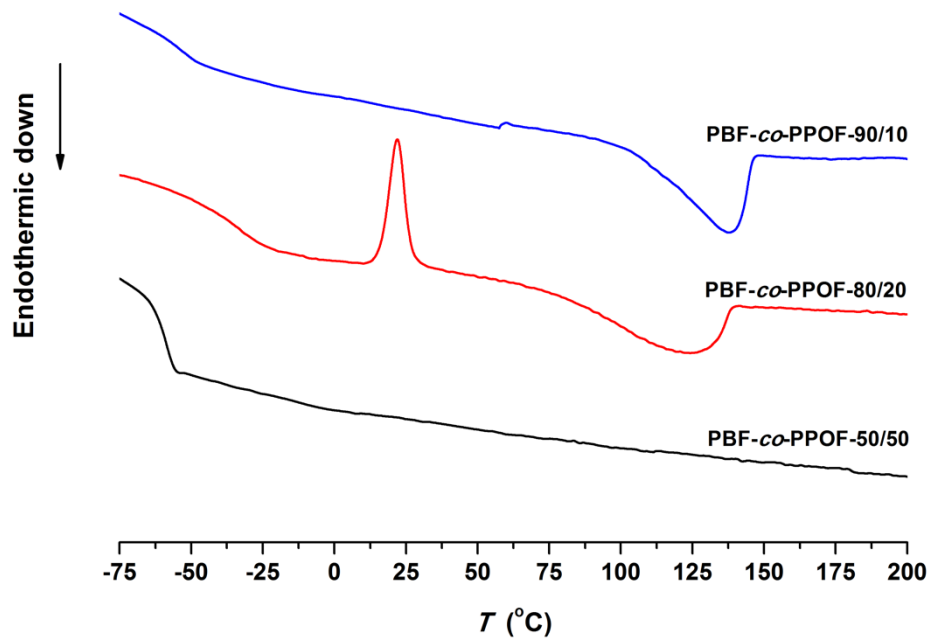

Figure S4. DSC curves (second scan) of all PBF-co-PPOF copolymers studied.

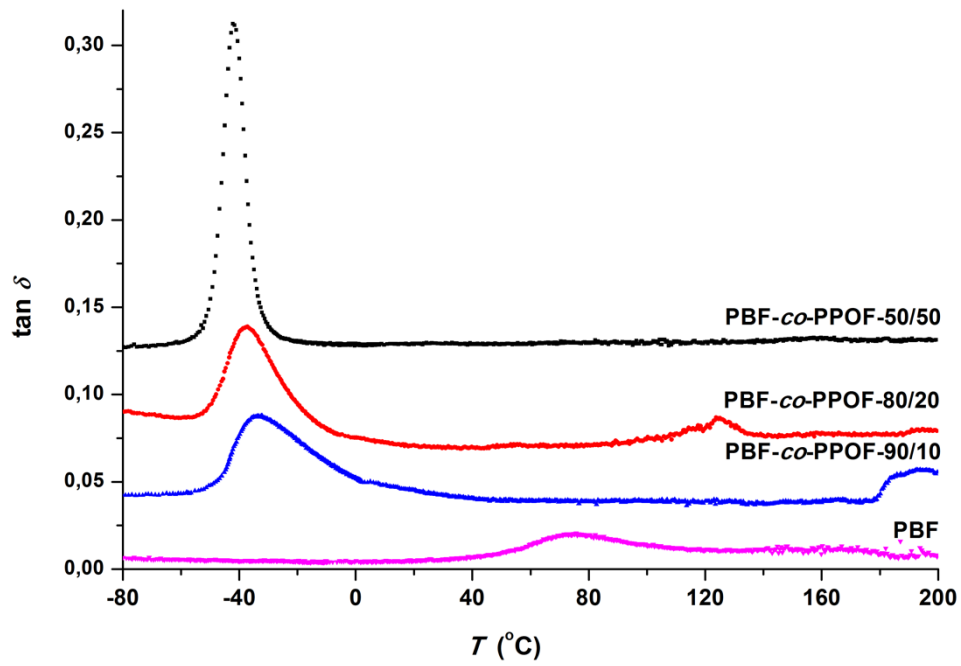

Figure S5. Tan  $\delta$  of PBF and PBF-co-PPOF (co)polymers, at 1 Hz.

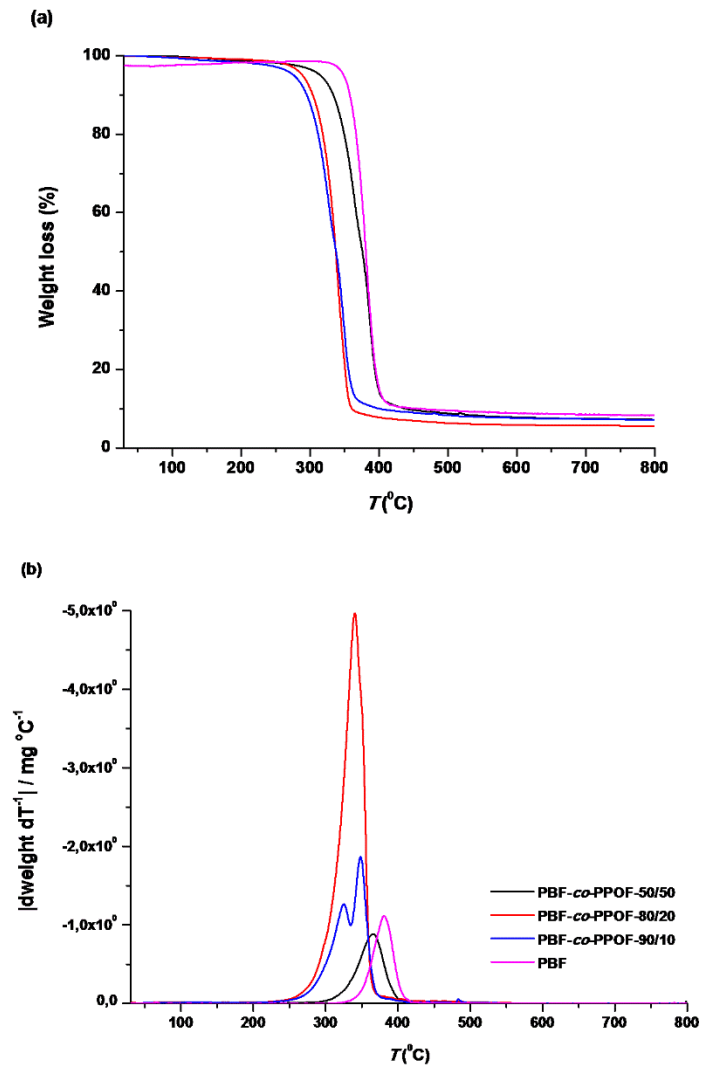

Figure S6. TGA (a) and DTGA (b) thermograms of PBF-co-PPOF copolymers and PBF homopolymer.
